# Supplementary material for: A combinational approach of multilocus sequence typing and other molecular typing methods in unravelling the epidemiology of Erysipelothrix rhusiopathiae strains from poultry and mammals
Source: PubMed Central journal article supplement (PMC4509749; doi:10.1186/s13567-015-0216-x), 2015-07-21
Supplement: 13567_2015_216_MOESM2_ESM.pdf [file 13567_2015_216_MOESM2_ESM.pdf]

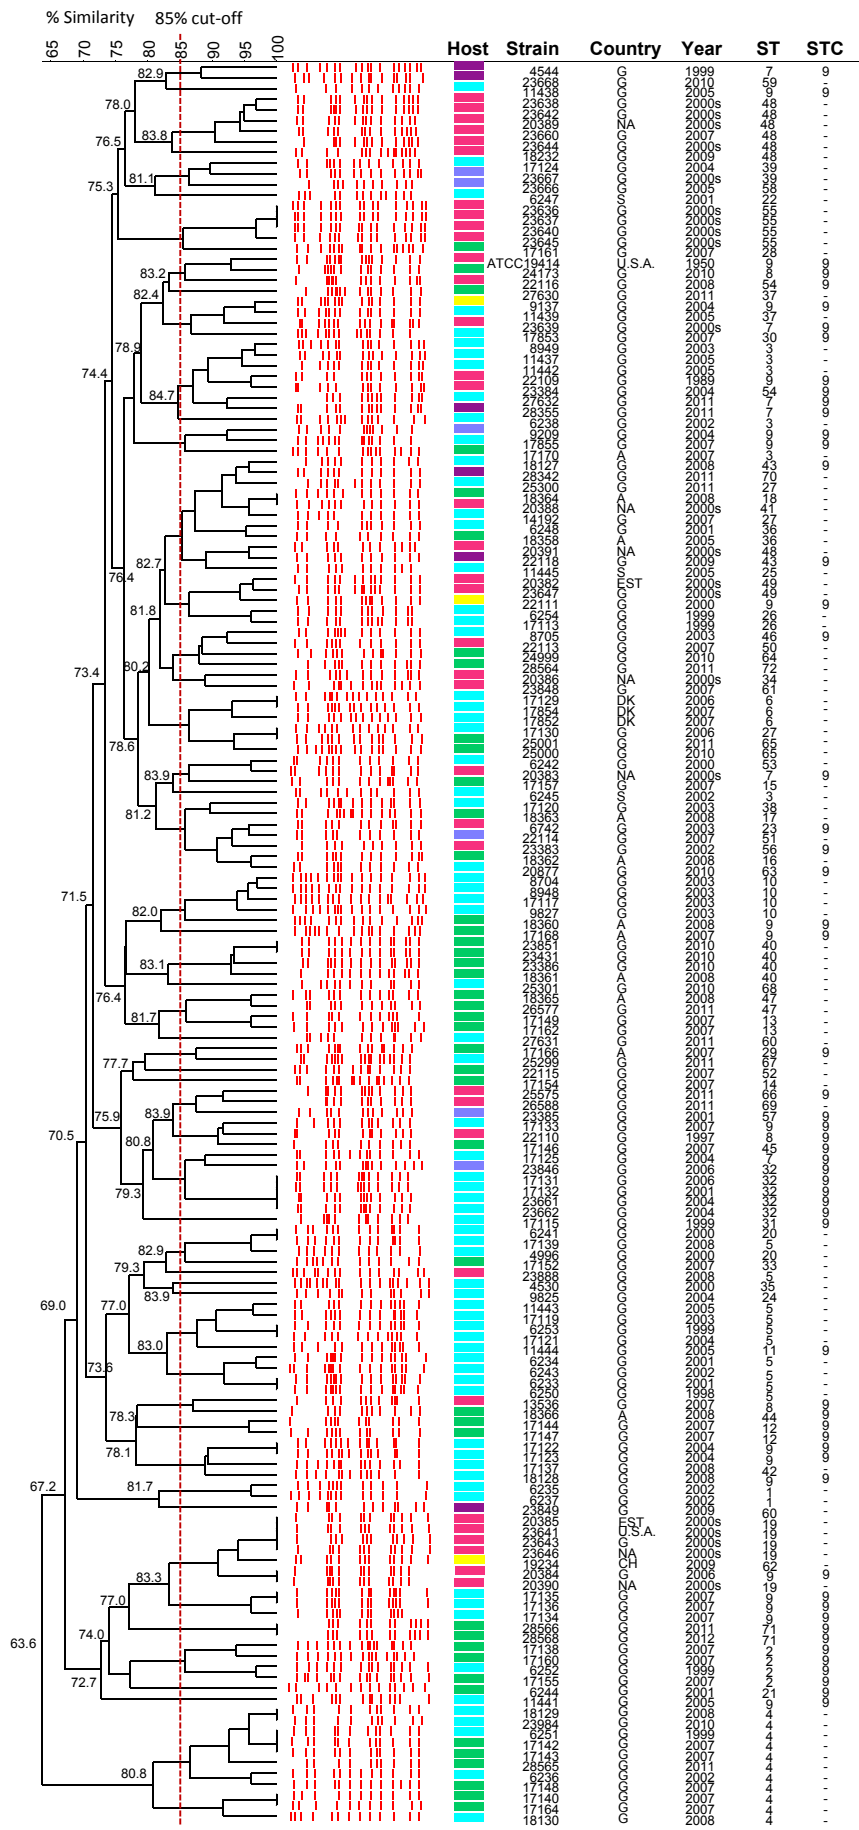

**Host**

- Chicken
- Turkey
- Other Birds
- Pig
- Other Animals
- Human

**Abbreviations:**

- ST = Sequence Type
- ST = ST complex
- G = Germany
- S = Sweden
- EST = Republic of Estonia
- DK = Denmark
- A = Austria
- CH = Switzerland
- NA = unknown
